# Supplementary material for: Marine Rhodobacterales as Drivers of Ulva Growth: From macroalgal–bacterial Interactions to Bioactive Factor Isolation
Source: Research Square preprint supplement (doi:10.21203/rs.3.rs-7803114/v1), 2026-02-03
Supplement: Supplementary file 1 [file 72732bb898771aa2da58468b.pdf]

**Supporting information for**  
**Marine Roseobacteraceae as Drivers of *Ulva* Growth: From macroalgal-bacterial**  
**Interactions to Bioactive Factor Isolation**

Johann F. Ulrich<sup>1</sup>, Simon B. Redlich<sup>1</sup>, Anne Mohr<sup>1</sup>, John Vollmers<sup>2</sup>, Jörn Petersen<sup>3,4</sup>,

Thomas Wichard<sup>1\*</sup>

1-Institute for Inorganic and Analytical Chemistry, Friedrich Schiller University Jena,  
Lessingstr. 8, D-07743 Jena, Germany

2-Institute for Biological Interfaces 5, Karlsruhe Institute of Technology, Karlsruhe, Germany

3-Leibniz Institute DSMZ – German Collection of Microorganisms and Cell Cultures,  
Braunschweig, Germany

4-Institute of Microbiology, Technical University of Braunschweig, Braunschweig, Germany

\* Correspondence: [thomas.wichard@uni-jena.de](mailto:thomas.wichard@uni-jena.de); Tel.: +49-3641-948184

## Contents

|                                                                                                                                              |   |
|----------------------------------------------------------------------------------------------------------------------------------------------|---|
| Figure S1: Standardized morphogenetic bioassay with <i>Ulva compressa</i> .....                                                              | 3 |
| Figure S2: <i>Ulva</i> bioassay screening with selected <i>Roseobacter</i> strains showing new morphotypes .....                             | 4 |
| Figure S3: Morphogenesis-guided <i>Ulva</i> bioassays to characterize the thermal and UV stability of the<br><i>Roseovarius</i> factor. .... | 5 |

**Figure S1**

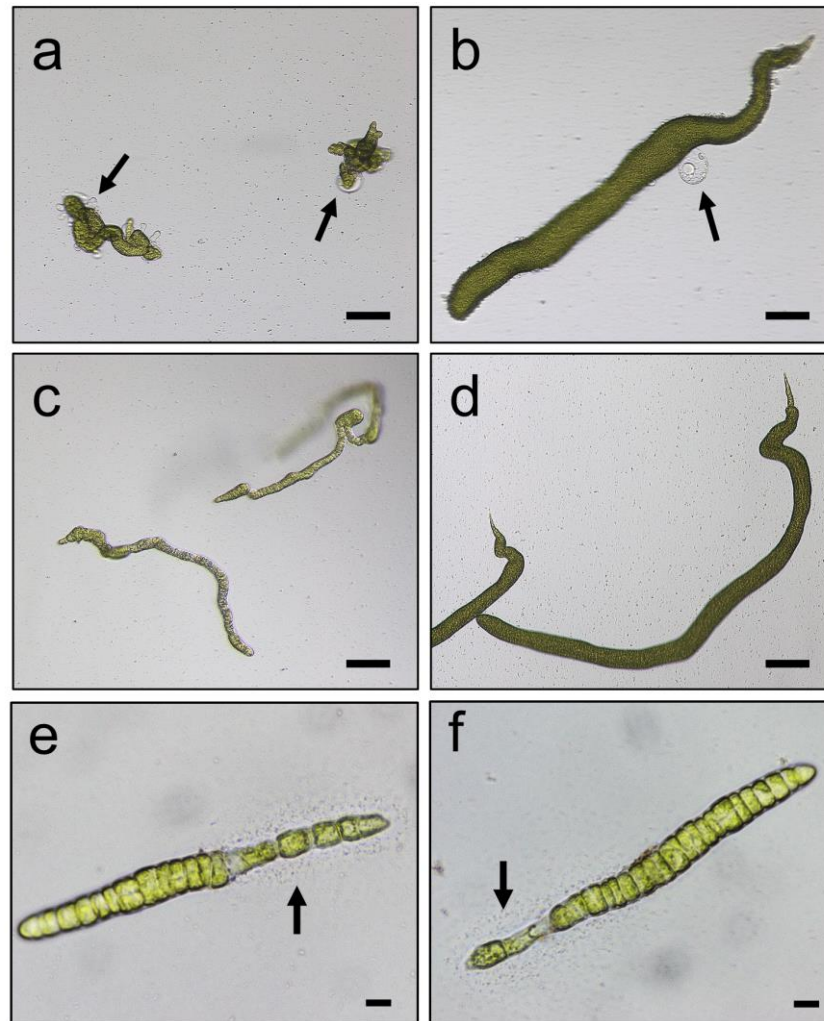

Fig. S1: Standardized morphogenetic bioassay with *Ulva compressa*. Representative morphogenetic phenotypes of *U. compressa* were monitored after 2 weeks of cultivation, magnification bar = 100  $\mu\text{m}$ : (a) axenic cultures with undefined cell aggregations and cell wall protrusions (cell wall protrusions, black arrow); (b) *Roseovarius* activity with typical thallus differentiation but damaged cell walls (cell wall protrusions, black arrow); (c) activity of *Maribacter* or thallusin, with rhizoid and cell wall formation (no cell wall protrusions); (d) tripartite community of *Ulva*–*Roseovarius*–*Maribacter* with complete morphogenetic growth; (e, f) representative examples for the accumulation of bacteria in the rhizoidal zone of 1 week old germlings (black arrow), scale bar = 10  $\mu\text{m}$ .

Figure S2

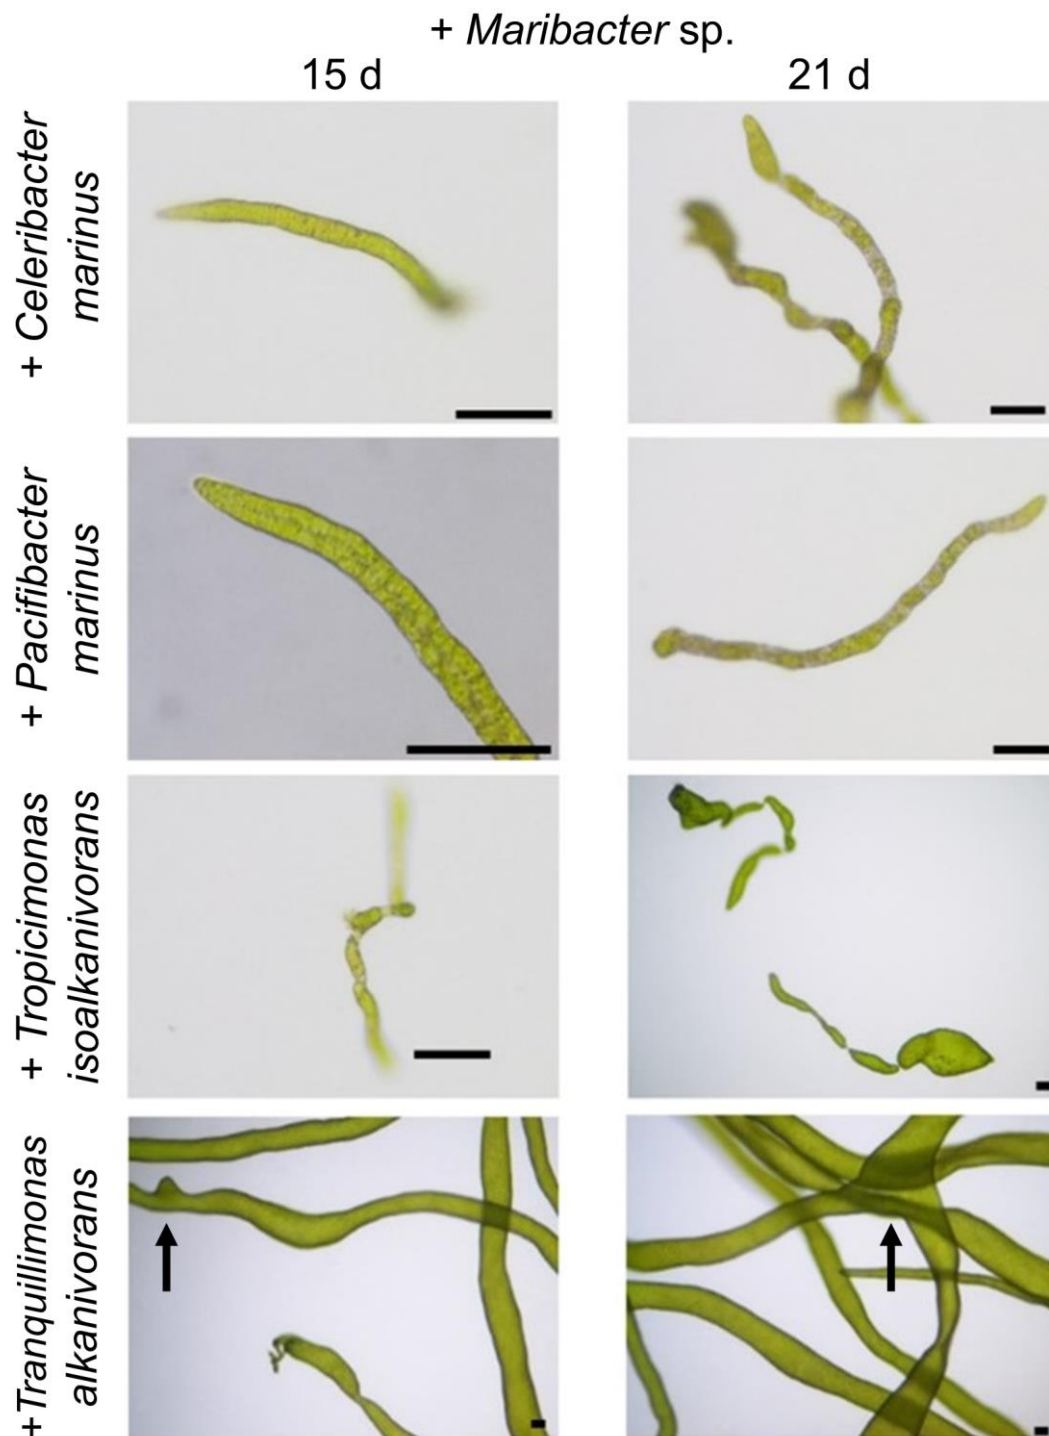

Fig. S2: *Ulva compressa* morphogenetic bioassay screening with selected bacterial strains showing novel morphotypes. The combination of the thallusin-producing *Maribacter* sp. MS6 with the respective test strains resulted in either algicidal effects or delayed development after 2–3 weeks of cultivation. Inoculation with *Tranquillimonas alkanivorans*, for instance, led to additional branching during thallus development (black arrow). Scale bar = 100  $\mu$ m.

**Figure S3**

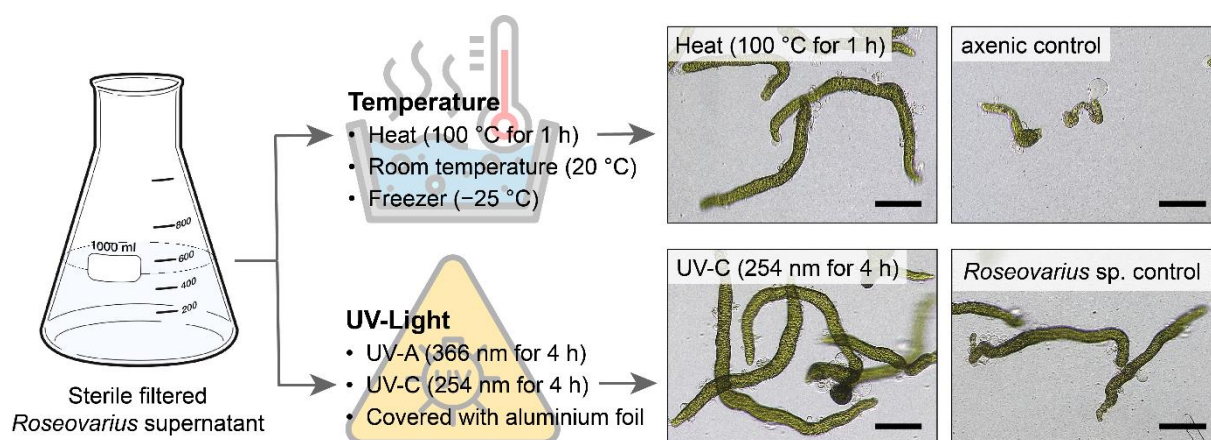

Fig. S3: Morphogenesis-guided *Ulva* bioassays to characterize the thermal and UV stability of the *Roseovarius* factor. The sterile-filtered *Roseovarius* supernatant was subjected to various physical treatments to assess its stability. To test thermostability, the supernatant was boiled in a water bath at 100 °C for one hour. As a reference and negative control, one sample was maintained at room temperature (20 °C), and another was frozen at −25 °C. The supernatant was exposed to UV-C (254 nm) for four hours for UV stability, while UV-A radiation (366 nm) was also tested. Negative control was kept in darkness, covered with aluminum foil. All treated samples were tested in *Ulva* bioassays and retained their biological activity. The *Ulva* cultures were grown for 14 days in microwell plates. Scale bar = 100 µm.
